# Supplementary material for: Organics removal pathways and algae-bacteria interactions of microalgal-bacterial granular sludge treating real municipal wastewater
Source: Research Square preprint supplement (doi:10.21203/rs.3.rs-3453507/v1), 2024-01-19
Supplement: Supplementary file 1 [file cf6d6279fe0de9ac7d58d8aa.docx]

*Supporting Information*

**Organics removal pathways and algae-bacteria interactions of microalgal-bacterial granular sludge treating real municipal wastewater**

**Yuting Shi1, Chengxiang Xu1, Bin Ji1 *, Anjie Li2, Xiaoyuan Zhang3, Yu Liu3**

1Department of Water and Wastewater Engineering, School of Urban Construction, Wuhan University of Science and Technology, Wuhan 430065, China

2Key Laboratory of Water and Sediment Sciences of Ministry of Education, State Key Laboratory of Water Environment Simulation, School of Environment, Beijing Normal University, Beijing 100875, China

3Engineering Laboratory of Low-Carbon Unconventional Water Resources Utilization and Water Quality Assurance, College of Environmental Science and Engineering, Nankai University, Tianjin 300350, China

* Corresponding author: Dr. Bin Ji

Telephone: 86-27-68893616

Email: [binji@wust.edu.cn (Bin](mailto:binji@wust.edu.cn%20(Bin) Ji)

**Document prepared:**

Supporting information: 9 Figures, 7 Tables

**Supplementary Figures**

**
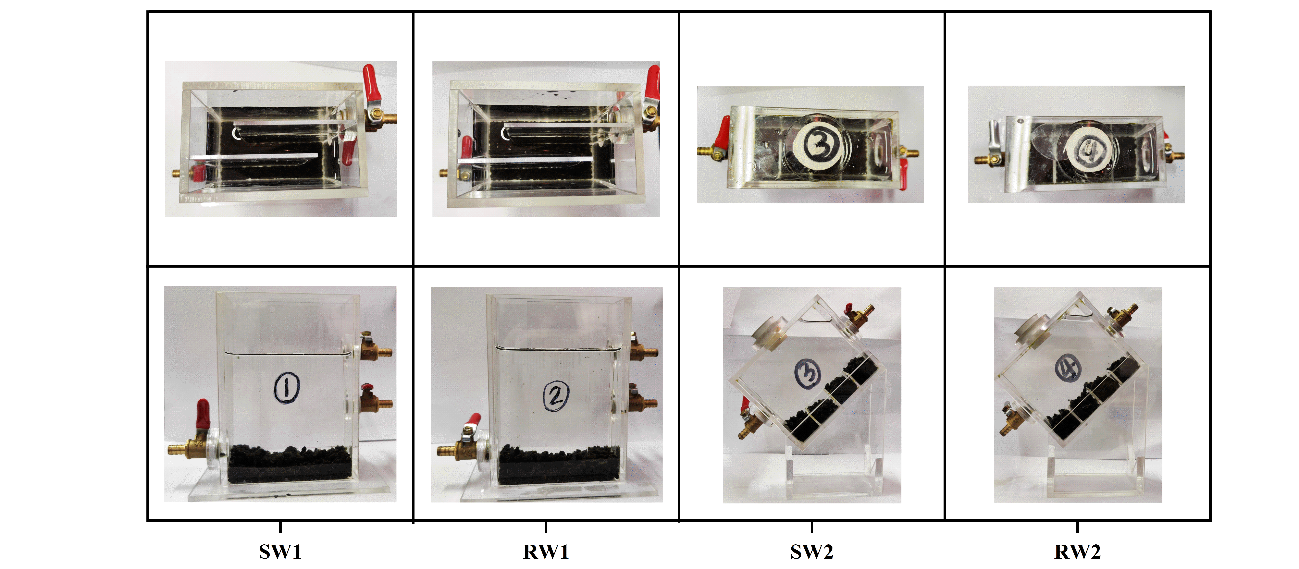
Figure S1**. The experimental set up of flat-plate and inclined-plate bioreactors. SW1: Synthetic wastewater in the flat-plate bioreactor, SW1: Synthetic wastewater in the flat-plate bioreactor, RW1: Real municipal wastewater in the flat-plate bioreactor, SW2: Synthetic wastewater in the inclined-plate bioreactor, RW2: Real municipal wastewater in the inclined-plate bioreactor.


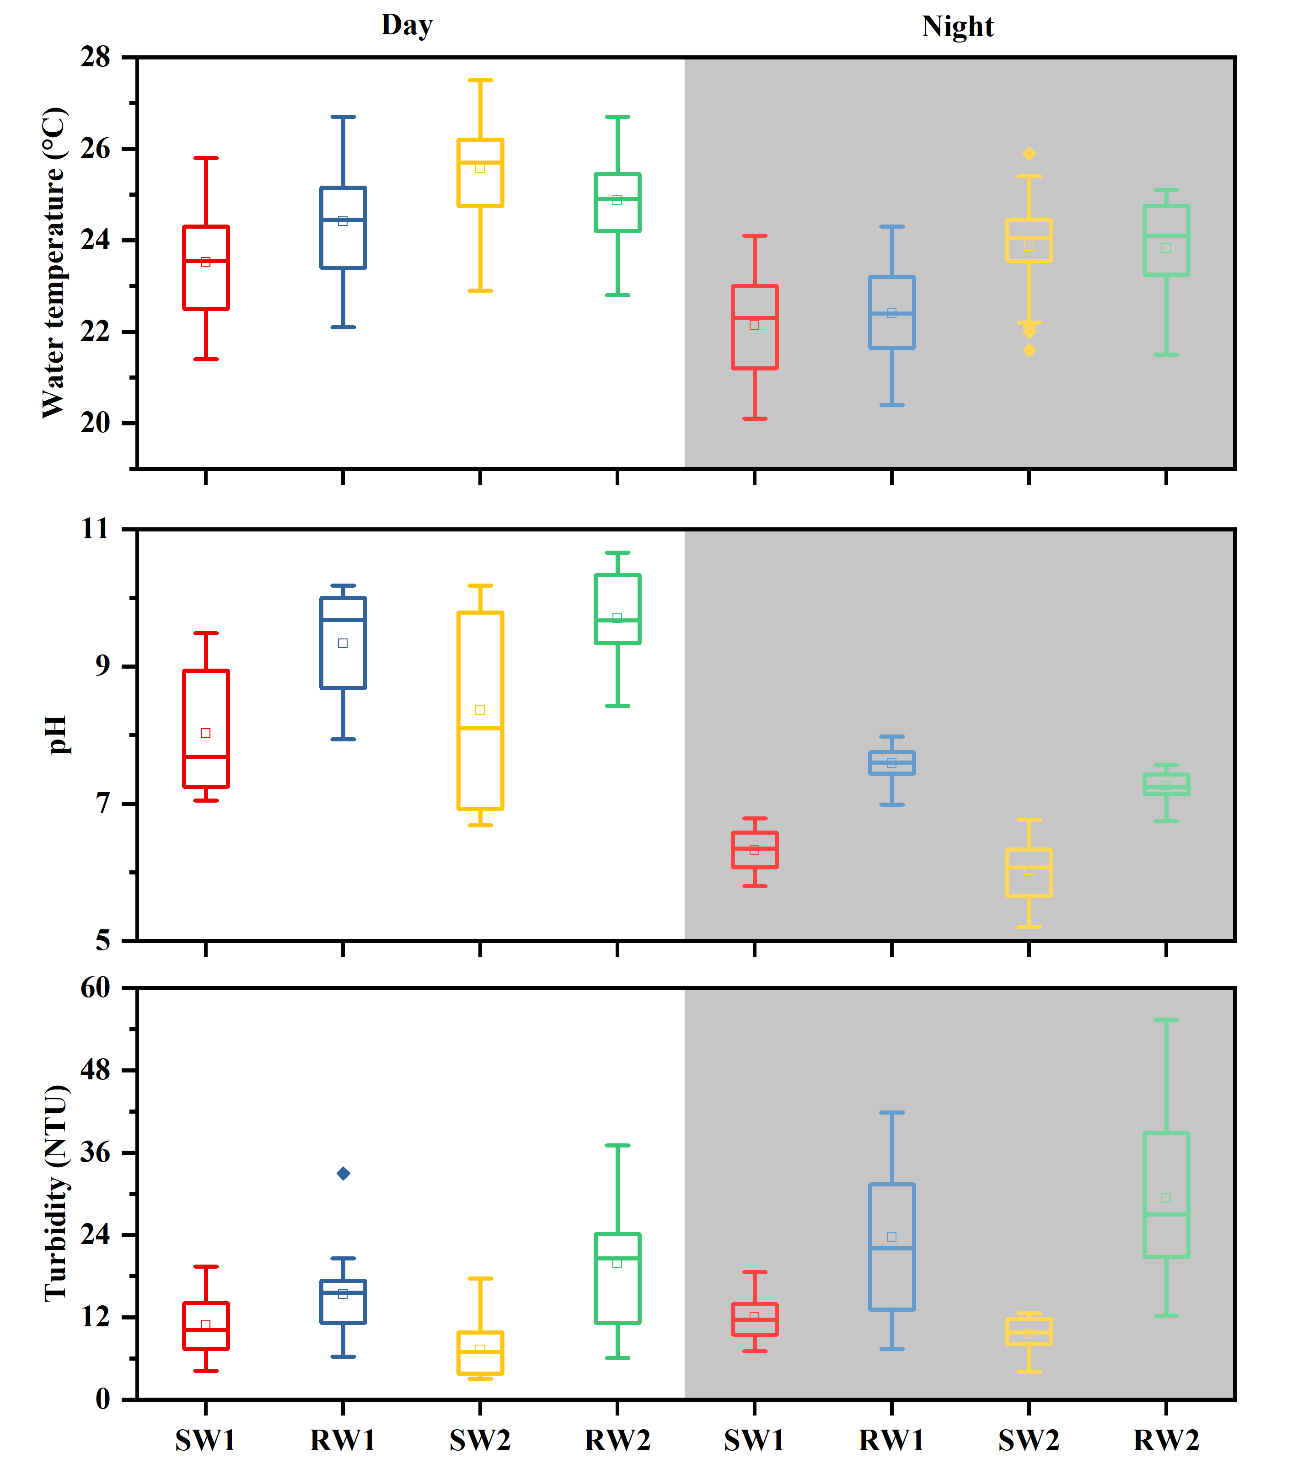


**Figure S2.** The water temperature (a), pH (b) and turbidity (c) of wastewater during the experiment. SW1: Synthetic wastewater in the flat-plate bioreactor, RW1: Real municipal wastewater in the flat-plate bioreactor, SW2: Synthetic wastewater in the inclined-plate bioreactor, RW2: Real municipal wastewater in the inclined-plate bioreactor.

**
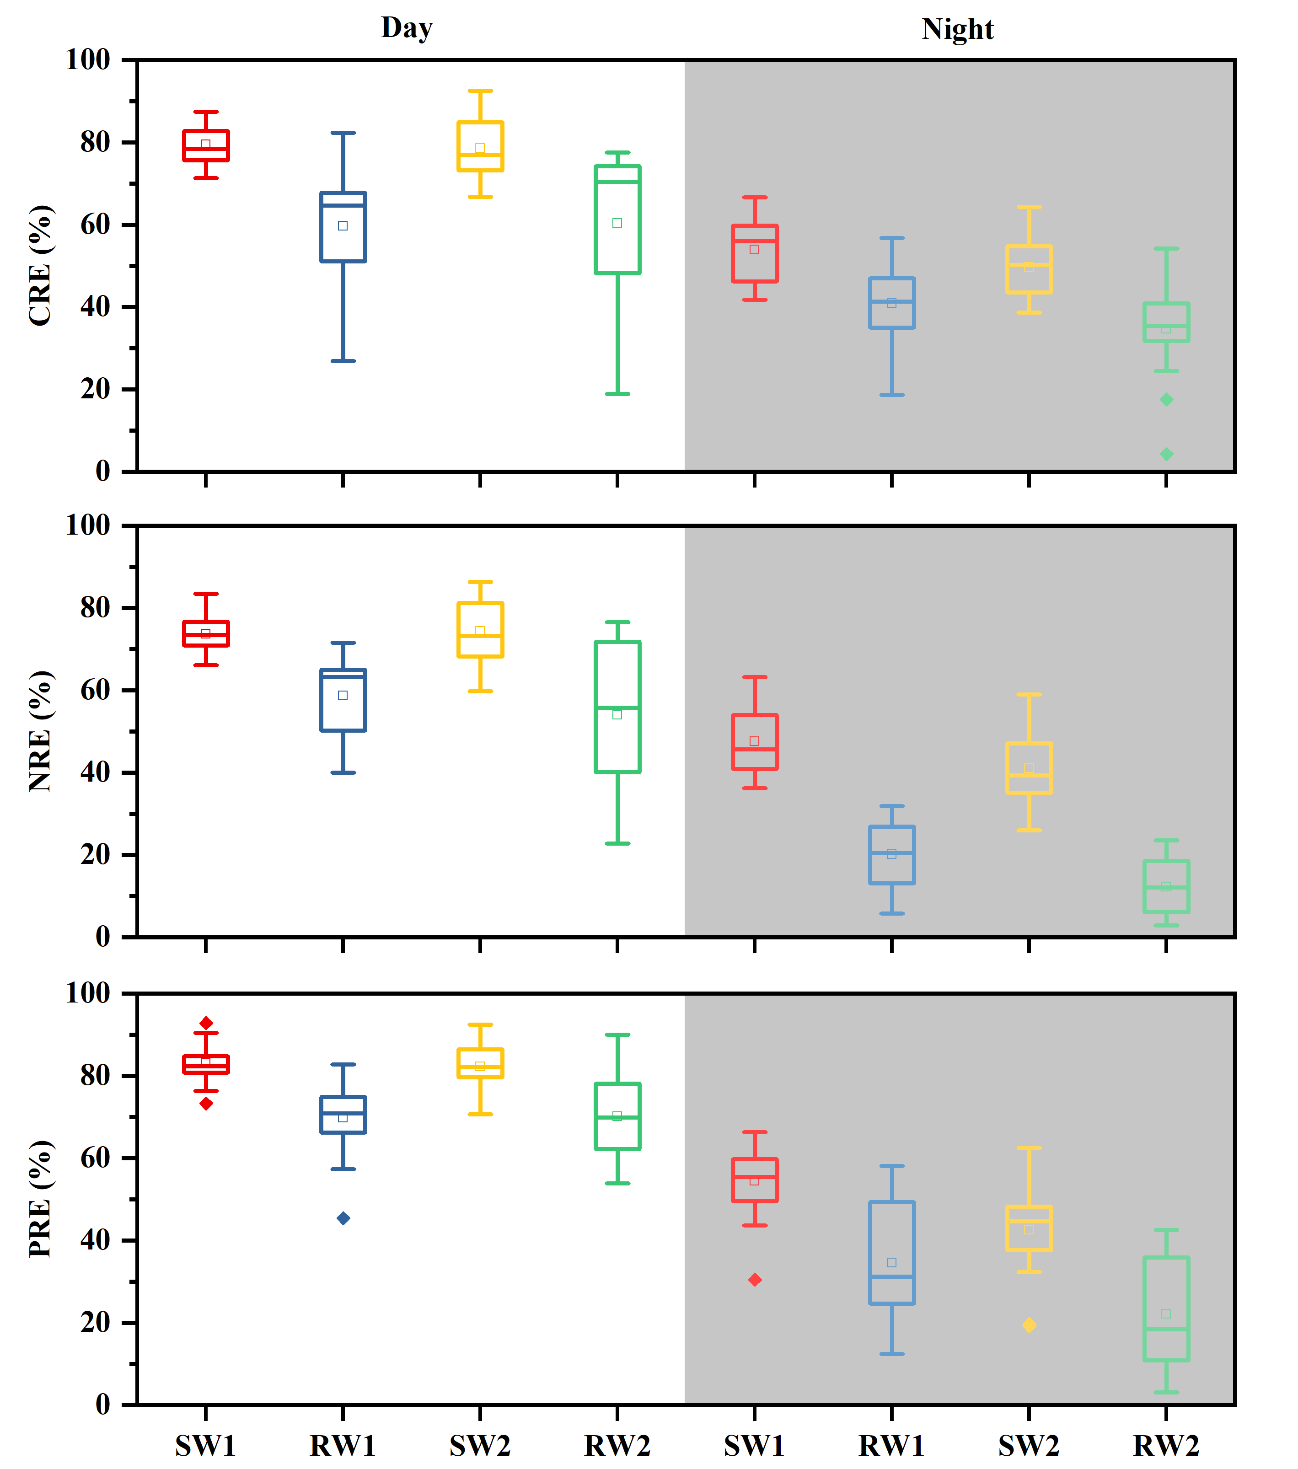
**

**Figure S3.** The removal efficiencies of COD, TN and TP on the day and night during the experiment. *：p＜0.05; **：p＜0.01; ***：p＜0.001. SW1: Synthetic wastewater in the flat-plate bioreactor, RW1: Real municipal wastewater in the flat-plate bioreactor, SW2: Synthetic wastewater in the inclined-plate bioreactor, RW2: Real municipal wastewater in the inclined-plate bioreactor.

**
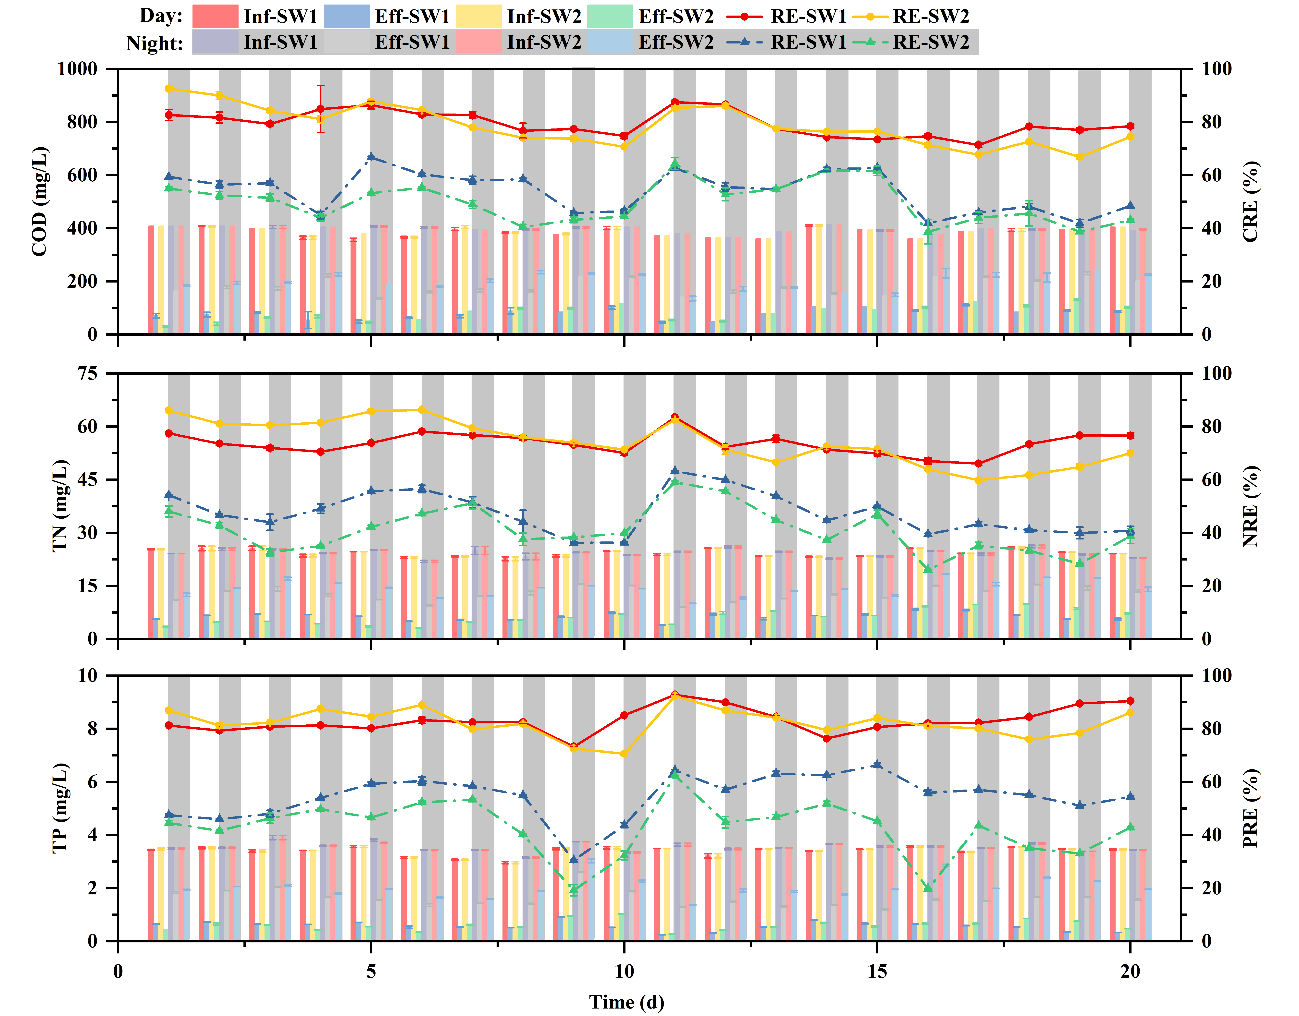
**

**Figure S4.** The concentration and removal efficiency (RE) of COD, TN and TP in synthetic wastewater on the day and night during the experiment. SW1: Synthetic wastewater in the flat-plate bioreactor, RW1: Real municipal wastewater in the flat-plate bioreactor, SW2: Synthetic wastewater in the inclined-plate bioreactor, RW2: Real municipal wastewater in the inclined-plate bioreactor.

**
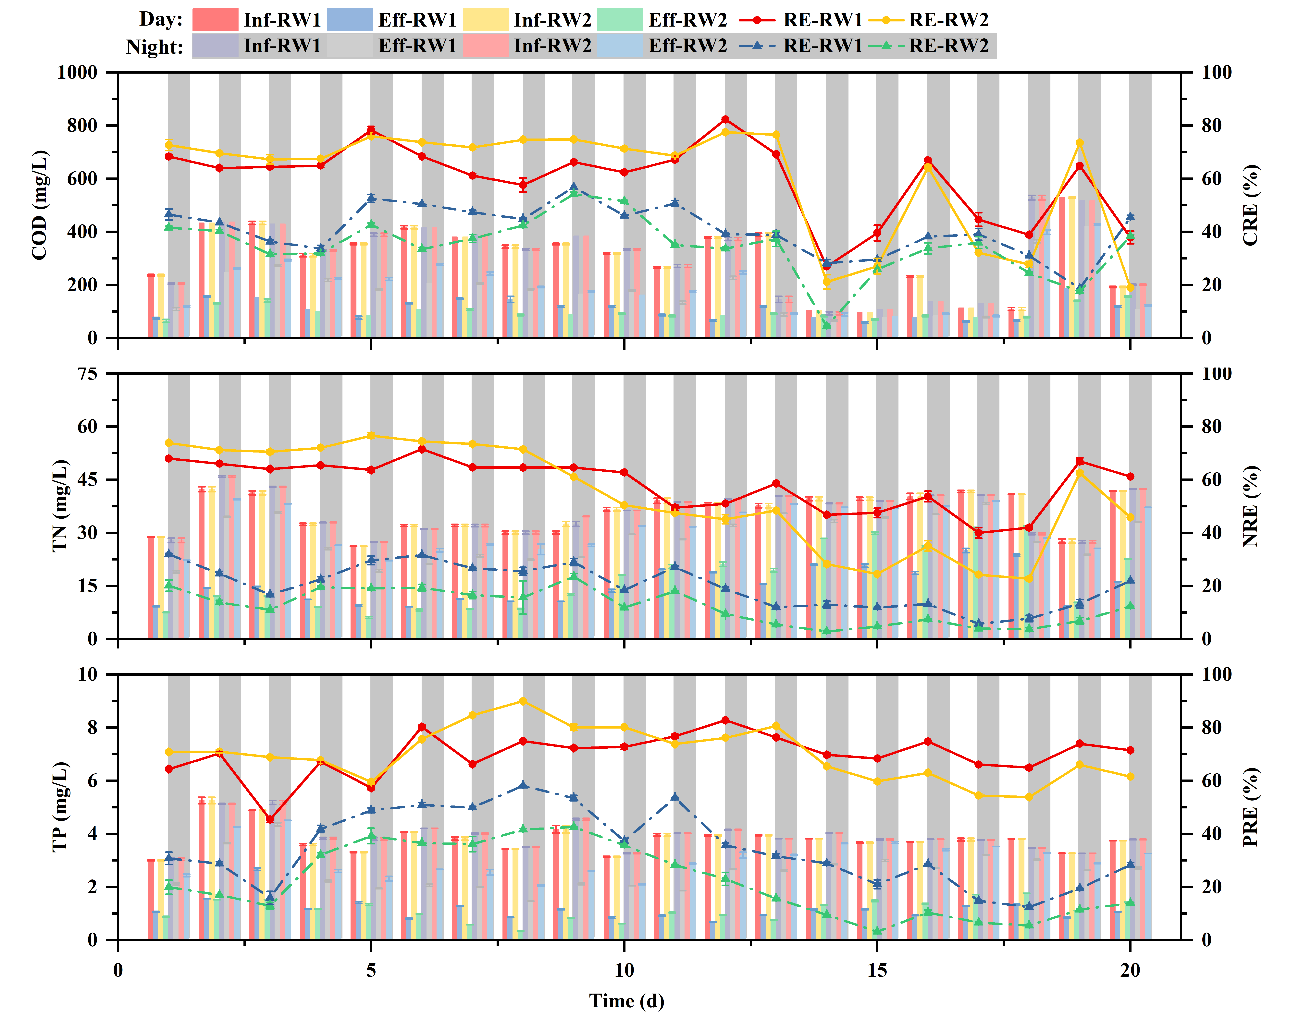
**

**Figure S5.** The concentration and removal efficiency (RE) of COD, TN and TP in real municipal wastewater of day and night during the experiment. SW1: Synthetic wastewater in the flat-plate bioreactor, RW1: Real municipal wastewater in the flat-plate bioreactor, SW2: Synthetic wastewater in the inclined-plate bioreactor, RW2: Real municipal wastewater in the inclined-plate bioreactor.

**
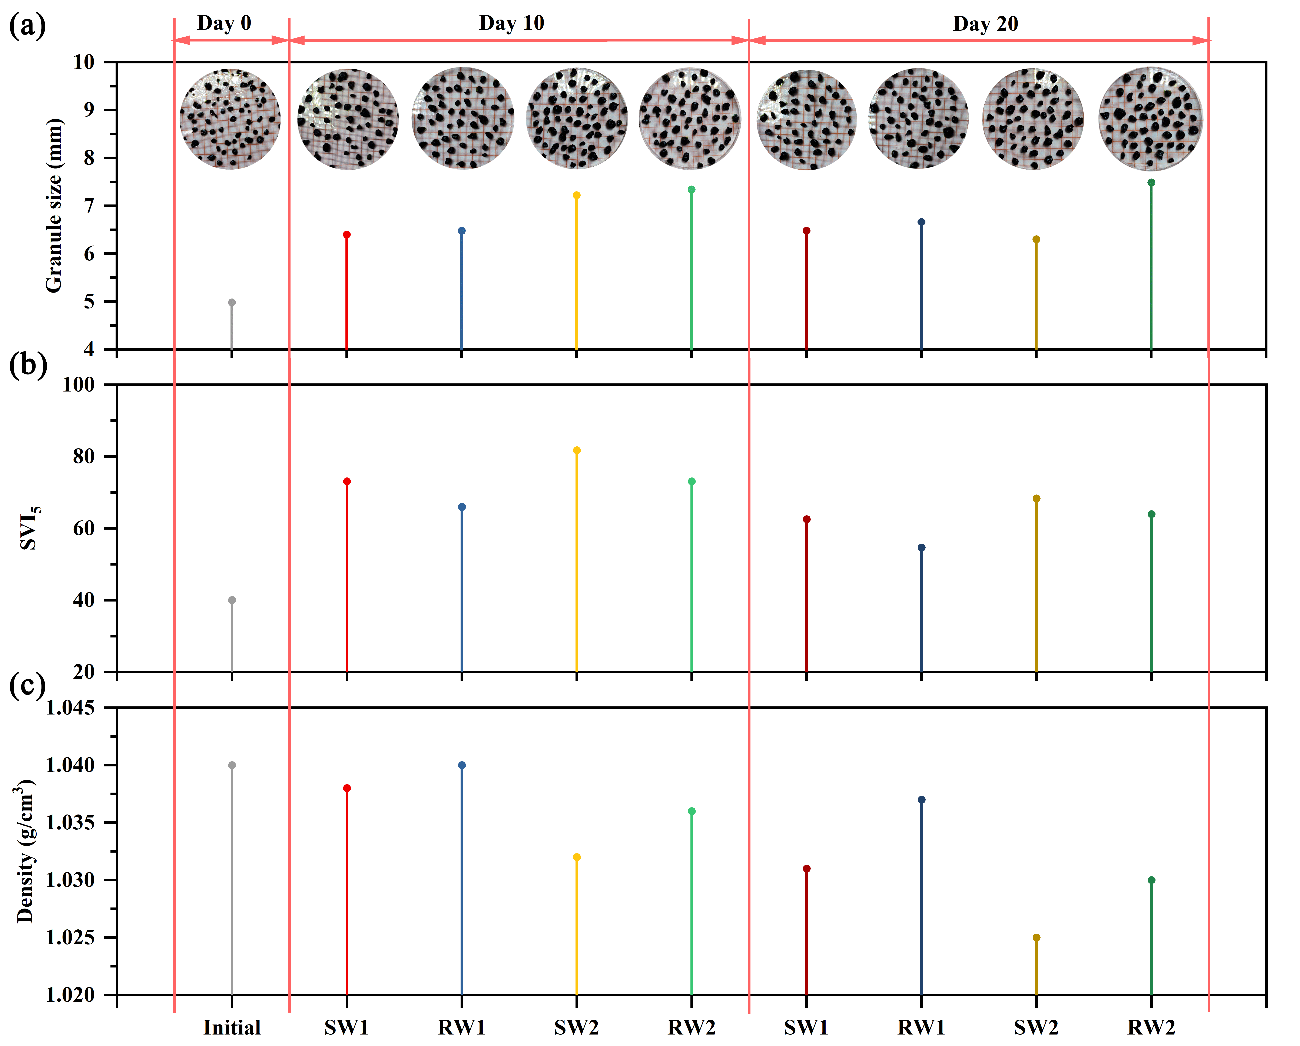
**

**Figure S6.** Thegranule size (a), SVI5 (b) and density (c) of MBGS on the day 0, day 10 and day 20 during the experiment. SW1: Synthetic wastewater in the flat-plate bioreactor, RW1: Real municipal wastewater in the flat-plate bioreactor, SW2: Synthetic wastewater in the inclined-plate bioreactor, RW2: Real municipal wastewater in the inclined-plate bioreactor.

**
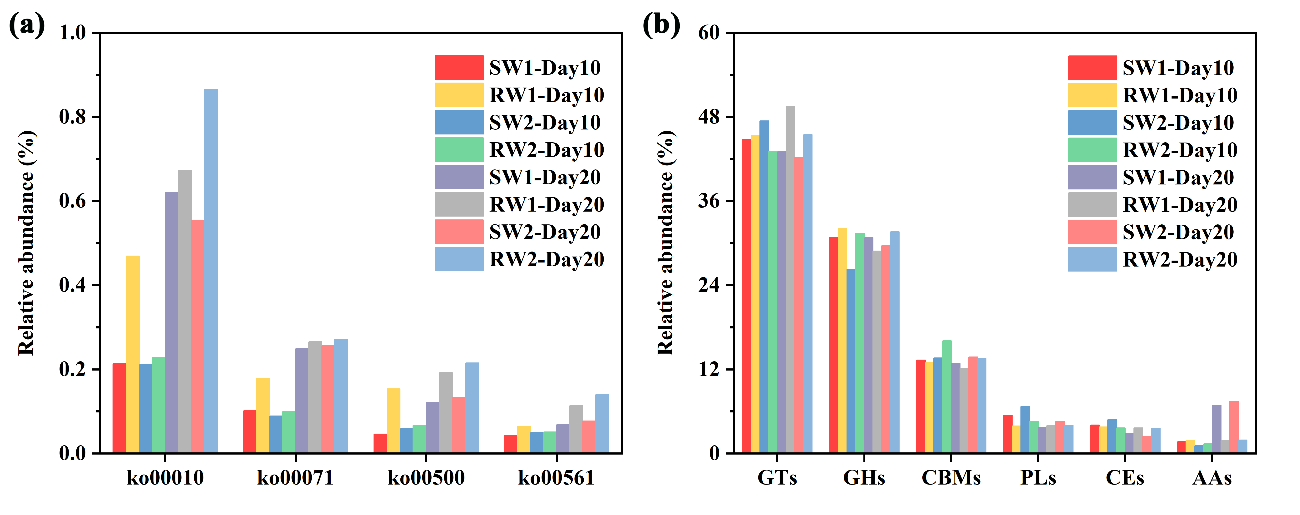
Figure S7.** The relative abundance of organics metabolism pathways (a) and Cazy class (b) on the day 10 and day 20 during the experiment based on metatranscriptomic sequencing. ko00010: Glycolysis/Gluconeogenesis, ko00071: Fatty acid degradation, ko00500: Starch and sucrose metabolism, ko00561: Glycerolipid metabolism. GTs: Glycosyl Transferases, GHs: Glycoside Hydrolases, CBMs: Carbohydrate-Binding Modules, PLs: Polysaccharide Lyases, CEs: Carbohydrate Esterases, AAs: Auxiliary Activities. SW1: Synthetic wastewater in the flat-plate bioreactor, RW1: Real municipal wastewater in the flat-plate bioreactor, SW2: Synthetic wastewater in the inclined-plate bioreactor, RW2: Real municipal wastewater in the inclined-plate bioreactor.

**
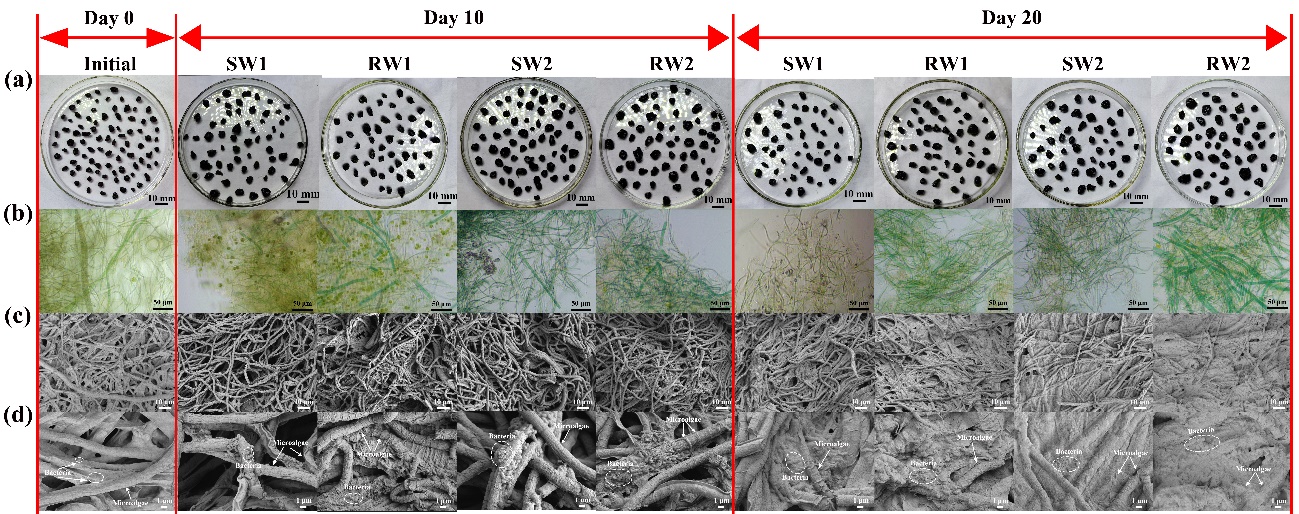
**

**Figure S8.** The granule appearance (a), granule morphology and microbial compositions of MBGS by fluorescence microscope (400x magnification) (b), scanning electron microscope of 1000x magnification (c) and 5000x magnification (d). SW1: Synthetic wastewater in the flat-plate bioreactor, RW1: Real municipal wastewater in the flat-plate bioreactor, SW2: Synthetic wastewater in the inclined-plate bioreactor, RW2: Real municipal wastewater in the inclined-plate bioreactor.

**
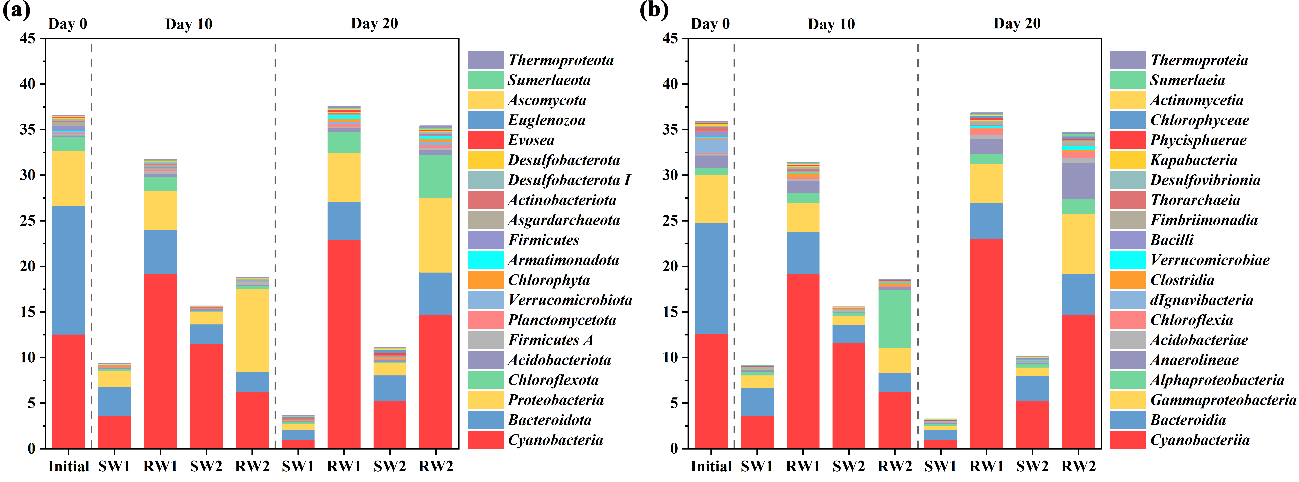
Figure S9.** The microbial community structure of MBGS at phylum (a) and class (b) level on the day 0, day 10 and day 20 during the experiment based on metetranscriptomics sequencing (top 20). SW1: Synthetic wastewater in the flat-plate bioreactor, RW1: Real municipal wastewater in the flat-plate bioreactor, SW2: Synthetic wastewater in the inclined-plate bioreactor, RW2: Real municipal wastewater in the inclined-plate bioreactor.

**Supplementary Tables**

**Table S1.** The composition of synthetic wastewater.

| Wastewater | Composition | Concentration (mg/L) |
| --- | --- | --- |
| Synthetic wastewater | Sucrose | 240.00 |
| Peptone | 80.00 |
| Beef extract | 55.00 |
| Urea | 15.00 |
| KH2PO4 | 15.35 |
| FeSO4·7H2O | 10.00 |
| NaHCO3 | 20.00 |
| CaCl2 | 10.00 |
| MgSO4·7H2O | 50.00 |
| Trace element solution | 1 mL/L |

**Table S2.** The pollutants (COD, TN, NH4+-N, NO3--N, NO2--N and TP) concentration variations and pH values of synthetic and real municipal wastewater.

| Pollutants or pH | Concentration (mg/L) or Value | |
| --- | --- | --- |
| Synthetic wastewater | Real municipal wastewater |
| COD | 400 | 89-535 |
| TN | 25 | 26-43 |
| NH4+-N | None | 21-39 |
| NO3--N | None | ＜0.3 |
| NO2--N | None | ＜0.1 |
| TP | 3.5 | 2.9 to 5.4 |
| pH | 6.58-7.18 | 6.00-7.30 |

**Table S3.** The size parameters of flat-plate and inclined-plate bioreactors.

| Size parameters | flat-plate bioreactor | Inclined-plate bioreactor |
| --- | --- | --- |
| Length | 10.0 cm | 12.0 cm |
| Width | 6.0 cm | 5.0 cm |
| Baffle spacing | 2.0 cm | None |
| Baffle length | 7.6 cm | None |
| Baffle numbers | 2 | None |
| Height | 15.0 cm | 10.0 cm |
| Water height | 10.0 cm | None |
| Inclination angle | None | 45° |
| Effective volume | 0.6 L | 0.6 L |

**Table S4.** TheC/N ratios of real municipal wastewater in the flat-plate and inclined-plate bioreactors during the daytime.

| **Days/**  **C/N ratios** | **Corresponding C/N ratio of each day** | | | | |
| --- | --- | --- | --- | --- | --- |
| Day | 1 | 2 | 3 | 4 | 5 |
| C/N | 3.09 | 3.85 | 3.94 | 3.61 | 5.07 |
| Day | 6 | 7 | 8 | 9 | 10 |
| C/N | 4.88 | 4.46 | 4.30 | 4.10 | 3.26 |
| Day | 11 | 12 | 13 | 14 | 15 |
| C/N | 2.55 | 3.69 | 3.88 | 1.00 | 0.92 |
| Day | 16 | 17 | 18 | 19 | 20 |
| C/N | 2.17 | 1.02 | 1.00 | 7.17 | 1.73 |

**Table S5.** Theaverage DO concentrations (mg/L) at 8:00 and 20:00 of synthetic and real municipal wastewater in the flat-plate and inclined-plate bioreactors during the experiment. Data were presented as mean ± standard error (n = 10).

| Day | Reactor | Wastewater | 8:00 | 20:00 |
| --- | --- | --- | --- | --- |
| 1-10 | Flat-plate bioreactor | Synthetic wastewater | 0.40 ± 0.21 | 1.85 ± 1.07 |
| Real municipal wastewater | 0.53 ± 0.33 | 7.76 ± 4.60 |
| Inclined-plate bioreactor | Synthetic wastewater | 1.05 ± 0.56 | 13.27 ± 1.45 |
| Real municipal wastewater | 1.02 ± 0.92 | 12.51 ± 6.26 |
| 11-20 | Flat-plate bioreactor | Synthetic wastewater | 0.29 ± 0.17 | 8.62 ± 3.90 |
| Real municipal wastewater | 0.41 ± 0.22 | 21+ ± 4.62 |
| Inclined-plate bioreactor | Synthetic wastewater | 0.43 ± 0.32 | 4.28 ± 2.11 |
| Real municipal wastewater | 0.48 ± 0.34 | 21+ ± 4.11 |

**Table S6.** Therelative abundance (%) of related enzymes in organics metabolism and photosynthesis. SW1: Synthetic wastewater in the flat-plate bioreactor, RW1: Real municipal wastewater in the flat-plate bioreactor, SW2: Synthetic wastewater in the inclined-plate bioreactor, RW2: Real municipal wastewater in the inclined-plate bioreactor.

| KEGG_KO | Day 0 | Day 10 | | | | Day 20 | | | |
| --- | --- | --- | --- | --- | --- | --- | --- | --- | --- |
| Flat-plate bioreactor | | Inclined-plate bioreactor | | Flat-plate bioreactor | | Inclined-plate bioreactor | |
| SW1 | RW1 | SW2 | RW2 | SW1 | RW1 | SW2 | RW2 |
| K00005 | 0.007 | 0.002 | 0.010 | 0.002 | 0.005 | 0.004 | 0.010 | 0.010 | 0.014 |
| K00134 | 0.084 | 0.027 | 0.031 | 0.018 | 0.020 | 0.043 | 0.051 | 0.048 | 0.067 |
| K00150 | 0.015 | 0.014 | 0.025 | 0.020 | 0.021 | 0.012 | 0.050 | 0.029 | 0.033 |
| K00163 | 0.011 | 0.004 | 0.005 | 0.001 | 0.007 | 0.003 | 0.006 | 0.002 | 0.009 |
| K00232 | 0.000 | 0.000 | 0.000 | 0.000 | 0.000 | 0.014 | 0.004 | 0.004 | 0.001 |
| K00249 | 0.000 | 0.001 | 0.000 | 0.000 | 0.000 | 0.000 | 0.000 | 0.000 | 0.000 |
| K00252 | 0.008 | 0.005 | 0.007 | 0.002 | 0.002 | 0.011 | 0.024 | 0.048 | 0.013 |
| K00255 | 0.000 | 0.000 | 0.000 | 0.000 | 0.000 | 0.004 | 0.000 | 0.001 | 0.000 |
| K00382 | 0.059 | 0.044 | 0.050 | 0.033 | 0.033 | 0.051 | 0.070 | 0.055 | 0.073 |
| K00627 | 0.020 | 0.005 | 0.013 | 0.006 | 0.007 | 0.015 | 0.021 | 0.021 | 0.026 |
| K00632 | 0.013 | 0.004 | 0.017 | 0.003 | 0.006 | 0.003 | 0.004 | 0.003 | 0.007 |
| K00691 | 0.000 | 0.002 | 0.000 | 0.001 | 0.000 | 0.000 | 0.000 | 0.000 | 0.000 |
| K00847 | 0.002 | 0.001 | 0.003 | 0.003 | 0.003 | 0.001 | 0.004 | 0.005 | 0.001 |
| K00864 | 0.003 | 0.000 | 0.000 | 0.000 | 0.001 | 0.000 | 0.004 | 0.000 | 0.003 |
| K00873 | 0.015 | 0.012 | 0.012 | 0.010 | 0.011 | 0.018 | 0.020 | 0.021 | 0.023 |
| K00886 | 0.001 | 0.007 | 0.006 | 0.007 | 0.004 | 0.005 | 0.009 | 0.012 | 0.008 |
| K00895 | 0.000 | 0.000 | 0.000 | 0.000 | 0.000 | 0.000 | 0.001 | 0.000 | 0.000 |
| K00927 | 0.048 | 0.012 | 0.012 | 0.009 | 0.007 | 0.023 | 0.032 | 0.035 | 0.033 |
| K01006 | 0.038 | 0.009 | 0.016 | 0.004 | 0.009 | 0.022 | 0.025 | 0.023 | 0.056 |
| K01007 | 0.020 | 0.016 | 0.074 | 0.030 | 0.050 | 0.028 | 0.056 | 0.061 | 0.068 |
| K01176 | 0.009 | 0.004 | 0.014 | 0.006 | 0.010 | 0.015 | 0.022 | 0.012 | 0.013 |
| K01623 | 0.011 | 0.006 | 0.032 | 0.002 | 0.003 | 0.064 | 0.017 | 0.057 | 0.021 |
| K01689 | 0.037 | 0.011 | 0.015 | 0.013 | 0.008 | 0.051 | 0.034 | 0.045 | 0.026 |
| K01692 | 0.001 | 0.000 | 0.000 | 0.000 | 0.003 | 0.003 | 0.006 | 0.007 | 0.001 |
| K01692 | 0.001 | 0.000 | 0.000 | 0.000 | 0.003 | 0.003 | 0.006 | 0.007 | 0.001 |
| K01785 | 0.000 | 0.001 | 0.000 | 0.000 | 0.000 | 0.006 | 0.000 | 0.005 | 0.000 |
| K01803 | 0.025 | 0.005 | 0.015 | 0.013 | 0.005 | 0.037 | 0.021 | 0.039 | 0.019 |
| K01810 | 0.012 | 0.005 | 0.006 | 0.004 | 0.005 | 0.007 | 0.015 | 0.003 | 0.029 |
| K01834 | 0.009 | 0.006 | 0.010 | 0.002 | 0.005 | 0.024 | 0.043 | 0.019 | 0.039 |
| K01835 | 0.005 | 0.001 | 0.004 | 0.002 | 0.001 | 0.005 | 0.005 | 0.004 | 0.004 |
| K02288 | 0.005 | 0.006 | 0.018 | 0.010 | 0.012 | 0.011 | 0.033 | 0.012 | 0.017 |
| K02636 | 0.036 | 0.012 | 0.028 | 0.018 | 0.024 | 0.018 | 0.065 | 0.029 | 0.050 |
| K02641 | 0.024 | 0.008 | 0.029 | 0.013 | 0.016 | 0.022 | 0.068 | 0.028 | 0.044 |
| K02703 | 0.121 | 0.084 | 0.300 | 0.102 | 0.148 | 0.551 | 1.425 | 0.753 | 1.096 |
| K02706 | 0.063 | 0.026 | 0.095 | 0.044 | 0.050 | 0.093 | 0.291 | 0.195 | 0.197 |
| K06445 | 0.013 | 0.004 | 0.029 | 0.003 | 0.005 | 0.000 | 0.007 | 0.003 | 0.003 |
| K07515 | 0.000 | 0.001 | 0.000 | 0.000 | 0.000 | 0.003 | 0.000 | 0.001 | 0.000 |
| K08765 | 0.000 | 0.000 | 0.000 | 0.000 | 0.000 | 0.004 | 0.000 | 0.002 | 0.000 |
| K08766 | 0.000 | 0.000 | 0.000 | 0.000 | 0.000 | 0.001 | 0.000 | 0.002 | 0.000 |
| K09479 | 0.000 | 0.000 | 0.000 | 0.000 | 0.000 | 0.001 | 0.000 | 0.001 | 0.000 |
| K12047 | 0.000 | 0.003 | 0.000 | 0.000 | 0.000 | 0.001 | 0.000 | 0.001 | 0.000 |
| K15633 | 0.008 | 0.001 | 0.006 | 0.003 | 0.003 | 0.004 | 0.013 | 0.010 | 0.008 |

**Table S7.** Thespecies Alpha diversity index table. SW1: Synthetic wastewater in the flat-plate bioreactor, RW1: Real municipal wastewater in the flat-plate bioreactor, SW2: Synthetic wastewater in the inclined-plate bioreactor, RW2: Real municipal wastewater in the inclined-plate bioreactor.

| Day | Sample | Chao1 | ACE | Shannon | Simpson |
| --- | --- | --- | --- | --- | --- |
| 0 | Initial | 44303.0 | 43314.6 | 4.40 | 0.61 |
| 10 | SW1 | 29112.7 | 28610.6 | 1.37 | 0.19 |
| RW1 | 43602.3 | 43080.4 | 3.72 | 0.54 |
| SW2 | 27451.5 | 27322.2 | 1.76 | 0.29 |
| RW2 | 36626.7 | 36323.2 | 2.07 | 0.35 |
| 20 | SW1 | 29757.5 | 29533.0 | 0.76 | 0.09 |
| RW1 | 47569.6 | 46763.6 | 4.35 | 0.63 |
| SW2 | 38032.4 | 37671.4 | 1.80 | 0.24 |
| RW2 | 48025.9 | 47180.3 | 4.43 | 0.60 |
